# Supplementary material
Source: publisher figshare collection journal article supplement (https://gsapubs.figshare.com/ndownloader/files/22747859)
Supplement: Supplementary file 1 [file 22747859]

GSA Data Repository Item # 7619

Title of article Geological Constraints in the Urban Environment

Author(s) W. R. Hansen

see Committee on Environment and Public Policy  
v. 1, p. -

Contents 7 pages

Selected References

---

---

---

---

---

---

---

---

---

---

# Geologic Constraints in the Urban Environment

GSA Depository # 76-19

## SELECTED REFERENCES

- Alfors, J. T., Burnett, J. L., and Gay, T. E., 1973, Urban geology master plan for California: California Div. Mines and Geology Bull. 198, 112 p.
- Appell, H. R., Fu, Y. C., Friedman, Sam, Yavorsky, P. M., and Wender, Irving, 1971, Converting Organ Wastes to Oil: U.S. Bureau of Mines Report of Investigations 7560, 20 p.
- Baxter, W. F., 1974, People or Penguins - The Case For Optimal Pollution: Columbia Univ. Press, 110 p.
- Bishko, D., Dunn, J. R., and Wallace, W. A., 1969, Planning for Non-Renewable Common Mineral Resources in Urban-Suburban Environs: U.S. Bureau of Mines, Open File Report 25-69. Available from Clearinghouse for Federal Scientific and Technical Information, Springfield, Virginia 22151, as PB 188 458.
- Bonilla, M. G., 1970, Surface faulting and related effects, in Earthquake Engineering, R. L. Wiegel, ed.: Prentice Hall, Englewood Cliffs, N.J., p. 47-74.
- Bronitsky, Leonard, 1972, The economics of construction mineral aggregates with an analysis of the industry in the Greater New York metropolitan area: Ph.D. Thesis Rensselaer Polytechnic Inst., 333 p.
- Brown, W. M., III, and Jackson, L. E., Jr., 1973, Erosional and Depositional Provinces and Sediment Transport in the South and Central Part of the San Francisco Bay Region, California: U.S. Geol. Survey, Misc. Geol. Inv. Map, MF-515.
- Christiansen, E. A., ed., 1970, Physical Environment of Saskatoon, Canada: Natl. Res. Council Canada Publ. 11378, 68 p.

- Cleaves, A. B., 1961, Landslide investigations: U.S. Dept. of Commerce, Bureau of Public Roads.
- Coates, D. R., ed., 1974, Environmental Geomorphology and Landscape Conservation: V. II Urban Areas: Dowden, Hutchinson & Ross, Stroudsburg, 454 p.
- Cohen, Philip, Franke, O. L., and Foxworthy, B. L., 1968, An Atlas of Long Island's Water Resources, 1968: N. Y. Water Resources Comm. Bull. 62, 117 p.
- Cooke, R. U., and Doornkamp, J. C., 1974, Geomorphology in Environmental Management: Oxford Univ. Press, London, 413 p.
- Dunn, J. R., 1974, Appraisal of Mineral Aggregate Deposits: American Institute of Professional Geologists, Guides and Suggested Practices Series.
- Eckel, E. B., ed. 1958, Landslides and engineering practice: Highway Research Board Special Report 29, NAS-NRC Publication 544.
- Environmental Protection Agency (U.S.), 1971, Control of Erosion and sediment deposition from construction of highway and land development: Office of Water Programs, 50 p.
- Environmental Protection Agency (U.S.), 1974, Guidelines, thermal processing and land disposal of solid waste: Federal Register v. 39, no. 158, p. 29238-29338.
- Fabos, J. G., 1973, Model for Landscape Resource Assessment: Part I of the Metropolitan Landscape Planning Model: Univ. of Mass. Agri. Exp. Sta. Res. Bull. 602, 141 p.
- Feth, J. H., 1973, Water Facts and Figures for Planners and Managers: U.S. Geol. Survey Circ. 601-I, 30 p.

- Flawn, P. T., 1970, Environmental Geology: Harper and Row, Inc., 313 p.
- Flawn, P. T., 1971, Mineral resources and multiple use land: in  
Environmental Planning and Geology, D. R. Nichols and C. C. Campbell,  
eds., U.S. Govt. Printing Office, Washington, D. C., p. 22-27.
- Foster, J. and Kuplesky, H., 1972, The Open Space Subdivision: New York  
State Office of Planning Services, Albany, 28 p.
- Frye, J. C., 1971, A geologist views the Environment: Illinois State  
Geol. Survey Environmental Geology Notes no. 42, 9 p.
- Gibbs, H. J., and Holland, W. Y., 1960, Petrographic and Engineering  
Properties of Loess: U.S. Dept. of Interior, Bureau of Reclamation,  
Engineering Monograph, no. 28.
- Guy, H. P., 1970, Sediment problems in urban areas: U.S. Geol. Survey  
Circ. 601-E, 8 p.
- Hansen, W. R., 1973, Effects of the May 5-6, 1973, Storm in the Greater  
Denver Area, Colorado: U.S. Geol. Survey Circ. 689, 20 p.
- Hantoon, M. C. Jr., 1971, PUD a Better Way for the Suburbs: The Urban  
Land Institute, Washington, D.C., 71 p.
- Henderson, R., Heath, E. G., and Leighton, F. B., 1973, What land-use  
planners need from geologist in Moran, D. E., Slosson, J. E.,  
Stone, R. O., and Yelverton, C. A., ed., Geology, Seismicity and  
Environmental Impact: Assoc. Eng. Geologists Special Publication,  
Oct. 1973.
- Hewitt, D. F., 1962, Urban Expansion and the Mineral Industries in  
the Toronto-Hamilton Area: Ontario Department of Mines, Industrial  
Mineral Report No. 8.

- Hines, W. G., 1973, Evaluating pollution potential of land-based waste disposal, Santa Clara County, California: U.S. Geol. Survey Water Resources Investigations WRI 31-73, 21 p. and map.
- Hollis, E. P., 1971, Bibliography of earthquake engineering, 3rd edition: Earthquake Engineering Research Inst., Oakland, Calif.
- Hughes, G. M., Landon, R. A., and Farvolden, R. N., 1971, Hydrogeology of solid waste disposal sites in northeastern Illinois: U.S. Environmental Protection Agency, 154 p.
- Jahns, R. H., 1969, Seventeen Years of Response by the City of Los Angeles to Geologic Hazards: Proc. of the Geol. Hazards and Public Problems Conf., U.S. Govt. Printing Office, Washington, p. 283-295.
- The Joint Panel on the San Fernando Earthquake, 1971, the San Fernando Earthquake of February 9, 1971: National Academy of Sciences, National Academy of Engineering, Washington, D.C., p. 1-24.
- Kaiser, E. J. and others, 1974, Promoting Environmental Quality Through Urban Planning and Controls: U.S. Environmental Protection Agency, Washington, D.C., 441 p.
- Kent, T. J., Jr., 1970, Open Space for the San Francisco Bay Area: Inst. of Governmental Studies, Univ. of Calif., Berkeley, 85 p.
- Knott, J. M., 1973, Effects of Urbanization on Sedimentation and Floodflows in Colma Creek Basin, California: U.S. Geol. Survey Open-File Rept., Menlo Park, Ca., 54 p.
- Lee, F. T., ed., 1974, Active Clays in Engineering and Construction practice: Bull. of the Assoc. of Engineering Geologists, v. 11, no. 4, p. 259-419.
- Legget, R. F., 1973, Cities and geology: McGraw-Hill, Inc., New York, 624 p.

Leighton, F. B., 1966, Landslides and Hillside Development: Assoc. Eng.

Geologists Special Publication, Oct., 1966.

Leighton, F. B., 1974, Landslides: Targets for land-use planning in

California: Geol. Soc. America Symposium, Oct. 1974.

Leonards, G. A., 1962, Foundation Engineering: McGraw-Hill Book Company.

Leopold, L. B., 1968, Hydrology for urban land planning - a guidebook

on the hydrologic effects of urban land use: U.S. Geol. Survey

Circ. 554, 18 p.

Little, C. E., 1968, Challenge of the Land: Pergamon Press, New York,

151 p.

McComas, M. R., 1968, Geology Related to Land Use in the Hennepin Region:

111. State Geol. Surv. Circ. 422, 24 p.

McHarg, I. L., 1969, Design with Nature: Natural History Press, Garden

City, N. Y., 197 p.

Mader, G. G., and Crowder, D. F., 1969, An experiment in using geology

for city planning--the experience of the small community of Portola

Valley, California: in Proceedings of the Symposim on Engineering

Geology in the Urban Environment arranged by the Association of

Engineering Geologists, National Meeting, Oct. 1969; U.S. Geol.

Survey and U.S. Dept. of Housing and Urban Development.

Metropolitan Washington Council of Governments, 1968, Natural Features of

the Washington Metropolitan Area: The Council, Washington, D. C.

49 p.

Morton, D., and Streitz, R., 1967, Landslides: Calif. Div. Mines and

Geology Mineral Information Service, vo. 20, Part I & II, no. 10, 11.

Nichols, D. R., and Buchanan-Banks, J. M., 1974, Seismic hazards and

land-use planning: U.S. Geol. Survey Circ. 690, p. 1-33.

- Nichols, D. R., and Campbell, C. C., eds., 1971, Environmental Planning and Geology: Proceedings of the Symposium on Engineering Geology in the Urban Environment arranged by the Association of Engineering Geologists 1969 Ann. Mtg: U.S. Dept. of Housing and Urban Development and U.S. Geological Survey, 204 p., U.S. Govt. Printing Off.
- Peck, R. B., Hanson, W. E., and Thornburn, T. H., 1973, Foundation Engineering: second edition, John Wiley & Sons, Inc.
- Platt, R. H., 1972, The Open Space Decision Process: Univ. of Chicago, Dept. of Geog. Res. Paper No. 142, 189 p.
- Rantz, S. E., 1970, Urban sprawl and flooding in southern California: U.S. Geol. Survey Circ. 601-B, 11 p.
- Richter, C. F., 1958, Elementary seismology: W. H. Freeman and Co., San Francisco, Calif., p. 1-768.
- Risser, H. E. and Major, R. L., 1967, Urban Expansion - An Opportunity and a Challenge to Industrial Mineral Producers: Ill. State Geol. Survey Environ. Notes no. 16, 19 p.
- Schneider, W. J., 1970, Hydrologic implications of solid-waste disposal: U.S. Geol. Survey Circ. 601-F, 10 p.
- Schneider, W. J., Rickert, D. A., and Spieker, A. M., 1973, Role of Water in Urban Planning and Management: U.S. Geol. Survey Circ. 601-H, 10 p.
- Sheaffer, J. R., von Boehm, Berndt, and Hackett, J. E., 1963, Refuse disposal needs and practices in northeastern Illinois: Northeastern Illinois Metropolitan Area Planning Commission Tech. Rept. 3, 72 p.

- Spieker, A. M., 1970, Water in Urban Planning, Salt Creek Basin,  
Illinois: U.S. Geol. Survey Water-Supply Paper 2002, 147 p.
- Terzaghi, Karl, and Peck, Ralph B., 1967, Soil Mechanics in Engineering  
Practice: second edition, John Wiley & Sons, Inc.
- U.S. Corps of Engineers, 1974, A Community Decision, U.S. Army Engineer  
District, Baltimore, 30 p.
- U.S. Geological Survey-National Oceanic and Atmospheric Administration,  
1971, The San Fernando, California, earthquake of February 9, 1971:  
U.S. Geol. Survey Prof. Paper 733, p. 1-254.
- U.S. National Commission on Materials Policy, 1973, Material needs and  
the environment today and tomorrow; final report of the National  
Commission on Materials Policy, June 1973: U.S. Govt. Printing  
Office, Washington, D.C.
- U.S. Task Force on Earthquake Hazard Reduction, 1970, Report of the  
Task Force on Earthquake Hazard Reduction: Executive Office of  
the President, Office of Science and Technology, p. 1-54.
- Wallace, D. A., 1970, Metropolitan Open Space and Natural Process:  
Univ. of Pennsylvania Press. Philadelphia. 199 p.
- Wallace, R. E., 1974, Goals, strategy, and tasks of the earthquake  
hazard reduction program, Geological Survey: U.S. Geol. Survey  
Circ. 701, p. 1-27.
- Whyte, W. H., Jr., 1958, Urban Sprawl: Fortune, v. 57, January, var.  
pages.
- Whyte, W. H., Jr., 1959, A vanishing resource: open space, now or never:  
Landscape Architecture, v. 50, no. 1, p. 8-13.
- Williams, E. A., directed, 1969, Open Space: The Choices Before California:  
Diablo Press, San Francisco, 187 p.
- Zaruba, Q. and Mencl, V., 1969, Landslides and their control: American  
Elsevier Publishing Co., New York.
